# Supplementary material for: Serum anion gap at admission as a predictor of mortality in the pediatric intensive care unit
Source: PubMed Central journal article supplement (PMC5431089; doi:10.1038/s41598-017-01681-9), 2017-05-03
Supplement: 41598_2017_1681_MOESM1_ESM.pdf [file 41598_2017_1681_MOESM1_ESM.pdf]

## **Serum anion gap at admission as a predictor of mortality in the pediatric intensive care unit**

<sup>1</sup>Min Jung Kim, MD; <sup>1</sup>Yoon Hee Kim, MD; <sup>1</sup>In Suk Sol, MD; <sup>1</sup>Soo Yeon Kim, MD; <sup>1</sup>Jong Deok Kim, MD; <sup>2</sup>Ha Yan Kim, MS; <sup>1</sup>Kyung Won Kim, MD, PhD; <sup>1</sup>Myung Hyun Sohn, MD, PhD; <sup>1</sup>Kyu-Earn Kim, MD, PhD

<sup>1</sup>Department of Pediatrics, Severance Hospital, Institute of Allergy, Brain Korea 21 PLUS Project for Medical Science, Yonsei University College of Medicine, Seoul, Korea

<sup>2</sup>Biostatistics Collaboration Unit, Yonsei University College of Medicine, Seoul, Korea

**Table S1. Calibration and discrimination to evaluate performance of each incorporated models**

|                           | <b>HL <math>\chi^2</math> (df)</b> | <b>HL p-value</b> | <b>AUC (95% CI)</b> |
|---------------------------|------------------------------------|-------------------|---------------------|
| <b>PIM2 with cAG</b>      | 13.9429 (8)                        | 0.0833            | 0.836 (0.786-0.885) |
| <b>PIM3 with cAG</b>      | 28.617 (8)                         | 0.0004            | 0.855 (0.808-0.902) |
| <b>PRISM III with cAG</b> | 3.4018 (8)                         | 0.9067            | 0.834 (0.785-0.883) |

HL, Hosmer and Lemeshow Goodness of fit test;  $\chi^2$ , chi-square; df, degree of freedom; AUC, area under the receiver operating characteristic curve; CI, confidence interval; cAG, corrected anion gap; PIM, Pediatric Index of Mortality; PRISM III, Pediatric Risk of Mortality III.

**Table S2. AUC comparisons between pre-existing models and cAG-incorporated models**

|                           | <b>AUC (95% CI)</b> | <b>p-value</b> |
|---------------------------|---------------------|----------------|
| <b>PIM2</b>               | 0.779 (0.722-0.837) | 0.0047         |
| <b>PIM2 with cAG</b>      | 0.836 (0.786-0.885) |                |
| <b>PIM3</b>               | 0.822 (0.766-0.877) | 0.1151         |
| <b>PIM3 with cAG</b>      | 0.855 (0.808-0.902) |                |
| <b>PRISM III</b>          | 0.808 (0.55-0.861)  | 0.0385         |
| <b>PRISM III with cAG</b> | 0.834 (0.785-0.883) |                |

AUC, area under the receiver operating characteristic curve; CI, confidence interval; cAG, corrected anion gap; PIM, Pediatric Index of Mortality; PRISM III, Pediatric Risk of Mortality III.
